# Supplementary material for: Extra Virgin Olive Oil Secoiridoids Modulate the Metabolic Activity of Dacarbazine Pre-Treated and Treatment-Naive Melanoma Cells
Source: Molecules. 2022 May 21;27(10):3310. doi: 10.3390/molecules27103310 (PMC9146374; doi:10.3390/molecules27103310)
Supplement: Supplementary file 1 [file molecules-27-03310-s001.zip › molecules-1733338 Supplementary materials Table S1-S3 Revised.xlsx]

## Sheet: Title and authors
		Article
		Supplementary files.Table A1-A3

## Sheet: Table S1
	Table S1. Spectrophotometric analysis of phenolic compounds in EVOOs.
		y = ax + b (y = absorbance, x = concentration of phenolic compound)
		Calibration curves (μg/mL)	R²	EVOO Žižolera (1)	EVOO Žižolera (2)	Mean values (n=2)	SD		EVOO Bjelica (1)	EVOO Bjelica (2)	Mean values (n=2)	SD		EVOO Crnica (1)	EVOO Crnica (2)	Mean values (n=2)	SD
	Total phenols (mg GAE/kg EVOO)	y = 0.000833x + 0.0219	0.999	389.894	368.652	379.273	15.0204		396.318	449.482	422.9	37.5928		315.166	373.141	344.153	40.9945
	o-diphenols (mg GAE/kg EVOO)	y = 0.000831x - 0.0216	0.9984	222.183	209.026	215.605	9.30287		129.47	114.256	121.863	10.7577		141.33	133.176	137.253	5.7653
	Total flavonoides (mg CE/kg EVOO)	y = 0.00361x - 0.00120	0.998011	398.916	385.472	392.194	9.50585		200.353	259.659	230.006	41.9356		156.849	162.288	159.568	3.84584

## Sheet: Table S2
	Table S2. 1H NMR analysis of secoiridoids in EVOOs.
				Calibration curves (mg/kg)
				y = ax + b (y = peak area ratio, x = concentration of phenolic compound expressed in mg/kg)
												Mean values (n=2)						Mean values (n=2)						Mean values (n=2)
Phenolic compounds	Mr	Peak in spectra	Chemical shift (ppm)	a	b	R²	LOD (mg/kg)	LOQ (mg/kg)	EVOO Žižolera (1) (mg/kg EVOO)	EVOO Žižolera (2) (mg/kg EVOO)	mg/kg EVOO Žižolera	SD	mol/L EVOO Žižolera**		EVOO Bjelica (1) (mg/kg EVOO)	EVOO Bjelica (2) (mg/kg EVOO)	mg/kg EVOO Bjelica	SD	mol/L EVOO Bjelica**		EVOO Crnica (1) (mg/kg EVOO)	EVOO Crnica (2) (mg/kg EVOO)	mg/kg EVOO Crnica	SD	mol/L EVOO Crnica**
* S-(E)-elenolide	225.4	1	9.28	0.00161708	0.00792367	-	-	17.5	1039.7	1067.9	1053.8	19.9404	0.00428252		174.34	154.59	164.465	13.9654	0.000668367		536.69	490.99	513.84	32.3148	0.00208819
* Ligstroside aglycone	380.4	2	9.51	0.00429738	-0.019639	-	-	5	29.2	30.83	30.015	1.15258	7.22759e-05		46.65	52.93	49.79	4.44063	0.000119894		7.44	7.91	7.675	0.33234	1.84813e-05
* Oleuropein aglycone	378.4	3	9.53	0.00410678	-0.0176591	-	-	5	216.17	214.47	215.32	1.20208	0.000521229		73.48	76.16	74.82	1.89505	0.000181118		20.08	18.81	19.445	0.898026	4.70709e-05
Oleocanthal	304.3	4	9.63	0.004	-0.009	0.9991	9.21	27.9	122.45	122.63	122.54	0.127279	0.000368868		184.19	244.93	214.56	42.9497	0.000645866		179.1	134.6	156.85	31.4663	0.000472148
Oleacein	320.3	5	9.65	0.0022	0.012	0.9976	12.46	37.75	216.05	216.45	216.25	0.282843	0.000618436		125.66	123.82	124.74	1.30108	0.000356734		387.41	269.73	328.57	83.2123	0.000939651
* Oleokoronal	377.4	6	11.74	0.00107434	-0.0184787	-	-	5	106.18	119.59	112.885	9.4823	0.000273987		145.6	158.4	152	9.05097	0.000368924		98.37	90.17	94.27	5.79828	0.000228806
* Oleomissional	379.4	7	11.8	0.00102669	-0.018768	-	-	5	86.56	89.19	87.875	1.85969	0.00021216		36.98	35.23	36.105	1.23744	8.71697e-05		101.85	90.84	96.345	7.78525	0.000232609
		above LOQ
		below LOQ, above LOD
		below LOD
	* S-(E)-elenolide, ligstroside aglycone, oleuropein aglycone, oleokoronal and oleomissional calibration curves were obtained from the literature (References 42, 57 in Manuscript)
	Oleacein and oleocanthal LODs and LOQs were calculated from y-intercept standard deviations (Sb) and slopes (a) of calibration curves using signal-to-noise ratio criteria of 3.3 (LOD = 3.3 x Sb/a) and 10 (LOQ = 10 x Sb/a).
	** olive oil density - 0.916 kg/L (20 ºC)

## Sheet: Table S3
	Table S3. HPLC-DAD analysis of phenolic compounds in EVOOs.
				Calibration curves (μg/mL)
				y = ax + b (y = peak area x = concentration of phenolic compound expressed in μg/mL)
										Mean values (n=3)						Mean values (n=2)							Mean values (n=3)
Phenolic compounds	Mr	Peak in chromatograms	Rt (min) standards	a	b	R²	Žižolera (1) (mg/kg EVOO)	Žižolera (2) (mg/kg EVOO)	Žižolera (3) (mg/kg EVOO)	mg/kg EVOO	SD	mol/L EVOO Žižolera**		Bjelica (1) (mg/kg EVOO)*	Bjelica (2) (mg/kg EVOO)*	mg/kg EVOO	SD	mol/L EVOO Bjelica**		Crnica (1) (mg/kg EVOO)	Crnica (2) (mg/kg EVOO)	Crnica (3) (mg/kg EVOO)	mg/kg VOO-Sea	SD	mol/L EVOO Crnica**
Hydroxytyrosol	154.16	1	12.02	19392.1	-230815	0.998	5.84	5.92	6.08	5.94667	0.122202	3.53344e-05		4.78	4.92	4.85	0.0989949	2.88181e-05		1.19	1.46	1.49	1.38	1	8.19979e-06
Tyrosol	138.16	2	15.66	14049.6	-168156	0.9989	2.99	3.07	3.15	3.07	0.08	2.03541e-05		5.176	5.763	5.4695	0.415072	3.62628e-05		1.79	1.89	2.05	1.91	0.131149	1.26633e-05
Pinoresinol	358.38	3	33.4	22889	-6791	1	13.51	12.51	13.73	13.25	0.650231	3.38663e-05		5.63	5.17	5.4	0.325269	1.38021e-05		6.44	5.4	6.33	6.05667	0.571343	1.54805e-05
Cinnamic acid	148.16	4	35.17	167807	-40359	0.998	0.96	0.8	0.94	0.9	0.087178	5.56425e-06		0.42	0.39	0.405	0.0212132	2.50391e-06		0.71	0.57	0.49	0.59	0.111355	3.64768e-06
Apigenin	270.05	5	42.7	60895.9	-38670	0.9999	2.65	2.23	2.71	2.53	0.261534	8.58167e-06		0.88	0.86	0.87	0.0141421	2.95101e-06		2.6	2.46	2.78	2.61333	0.160416	8.86433e-06
	The LODs and LOQs were calculated from y-intercept standard deviations (Sb) and slopes (a) of calibration curves using signal-to-noise ratio criteria of 3.3 (LOD = 3.3 x Sb/a) and 10 (LOQ = 10 x Sb/a).
	* Reference 79 in Manuscript
	** olive oil density - 0.916 kg/L (20 ºC)
